# Supplementary material for: Parenting Styles, Food Parenting Practices and Dietary Intakes of Preschoolers
Source: MDPI journal article supplement (doi:10.3390/nu13103630), 2021-10-16
Supplement: s1 [file s1]

### File S1. Step to step instructions for HSFFQ analysis.

1) Convert food frequencies to daily servings by using “88GP frequency factors” download from HSFFQ website (Figure A).[1] For example, if a child participant stated eating an apple a day, the mean servings per day would be 1.0. Food groups (meat, bread/cereal, milk, vegetables, fruit, sweets and fats) were determined by the HSFFQ (Figure B) (*The HSFFQ User’s Manual* Page F-8 ).[2] The servings of food items from the same group were added to the sum of “Mean Servings per Day Reported by Food Group”.

2) Convert food frequencies to food amount (g/day) for each food item. *The HSFFQ User’s Manual* Page E-48 provided portion size in gram weight assigned to each food item on the HSFFQ (Figure C).[2] Portion size assigned weights of women were used for adult participants, and portion size assigned weights of 3-5 years children were used for child participants. Then food weight in gram for each food item was calculated by multiplying “daily number of servings to each food item” by “portion size in gram weight assigned to foods”. For example, if a child participant stated eating an apple a day, the mean servings per day would be 1.0, the portion size in gram weight assigned to apple from Figure C was 124 g/serving, then the mean food weight per day to apple would be  $1.0 * 124 = 124\text{g}$ .

For the food items on the HSFFQ whose the portion sizes were not given in the Figure C, using “What's In the Foods You Eat” search tool[3] to find measure weights for one serving size directly. These food items include “Fruit cocktail”, “Zucchini”, “Popcorn or pretzels”, “Beer, wine, wine cooler, mixed drink or liquor”, “Tacos, burritos”, “Fried Chicken, chicken nuggets”, “Other chicken or turkey”, “Butter (not margarine)” and “Margarine”. The final portion size in gram weight assigned to each food item on the HSFFQ used in this study were presented in Table D. In this way we were able to calculate amounts of food consumption per day for participants of this study.

3) Nutrient data per 100 gm portion for the food items were derived from the HSFFQ and estimated using the Harvard nutrient database.[1] Table E presents the nutrient data for food items on the HSFFQ used in this study. Daily nutrients intakes from the HSFFQ were computed by converting the food frequency to a daily number of servings to each food item, multiplying this by the nutrient content for the assigned weight, and summing the value for all foods. The current version of the HSFFQ estimates seven micronutrients: calcium, iron, zinc, vitamin C, vitamin B6, vitamin A, and folate. Total calories, protein, carbohydrates, and fats intakes were calculated in the same way. Since carbohydrates and protein each provide 4 calories per gram, and fat contains 9 calories in each gram, then daily calorie sources (protein, carbohydrates, and fats) were reported.

The HSFFQ provided dietary intakes results regarding: 1) daily nutrient intakes (vitamin A, vitamin C, calcium, zinc, folate, iron, protein, and vitamin B6); 2) daily calorie intakes and sources (carbohydrates, protein, fats); 3) daily mean servings by food groups (meat, bread/cereal, milk, vegetables, fruit, sweets and fats).

Result 3 “mean servings by food group” was a direct reporting of the number of servings that the participants reported. The Result 1 “selected nutrient intakes” and Result 2 “calorie intakes and sources” were calculated from the frequency reported and the nutrients in the corresponding serving of food.[2]

### References:

1. Harvard T.H. Chan School of Public Health Nutrition Department's file download site. Available online: <https://regepi.bwh.harvard.edu/health/nutrition.html> (accessed on 11 December 2020).
2. Colditz, G. Dietary intake and health outcomes: final report. U.S. Department of Agriculture, Economic Research Service. Available online: <https://naldc.nal.usda.gov/download/32818/PDF> (accessed on 11 December 2020).
3. What's in the foods you eat search tool. U.S. Department of Agriculture website. Available online: [https://reedir.arsnet.usda.gov/codesearchwebapp/\(S\(z2vxwy1lgtfuvqjyz43troym\)\)/CodeSearch.aspx](https://reedir.arsnet.usda.gov/codesearchwebapp/(S(z2vxwy1lgtfuvqjyz43troym))/CodeSearch.aspx) (accessed on 11 December 2020).

**How do I calculate the number of servings of fruits or vegetables per day?**

If you would like to calculate the number of servings of any food grouping, you must sum the daily frequencies reported for the foods you select to represent your group. The frequency weights for the 88GP, 80outGP and the 97GP are listed below.

Example: 88GP servings of fruit per day

Participant reports:

Raisins 1-3 per month

Apple 1 per day

Orange 2-4 per week

Other fruit juices 2-3 times per day

Frequency factors:

Raisins – 0.08

Apple – 1.0

Oranges – 0.43

Other fruit juices – 2.5

Sum frequency factors:  $0.08 + 1.0 + 0.08 + 2.5 = 3.66$  servings per day of fruits

\*\*\*\*\*88GP frequency factors: \*\*\*\*\*

|        |                                        |
|--------|----------------------------------------|
| ffwgt1 | 0; never (default value for no answer) |
| ffwgt2 | 0.08; 1-3/mo                           |
| ffwgt3 | 0.14; 1/wk                             |
| ffwgt4 | 0.43; 2-4/wk                           |
| ffwgt5 | 0.8; 5-6/wk                            |
| ffwgt6 | 1.0; 1/day                             |
| ffwgt7 | 2.5; 2-3/day                           |
| ffwgt8 | 4.5; 4-5/day                           |
| ffwgt9 | 6.0; 6/day                             |

**Figure A.** How do I calculate the number of servings of fruits or vegetables per day?

Source: Harvard T.H. Chan School of Public Health Nutrition Department's file download site. Available at: <https://regepi.bwh.harvard.edu/health/nutrition.html> (accessed on 11 December 2020).

**meat=hamburg, hotdog, bologna, tuna, baked beans, other bean, liver, fr chicken, other chicken, pork, beef, fr fish, other fish and egg.**

**brdcer=crackers, rice, spaghetti, pizza, macaroni and cheese, bread, hot cereal, cold cereal, pancakes, english muffin, biscuits and cornbread.**

**milks=milk, cheese, pizza, pudding, yogurt, and macaroni and cheese.**

**veg=corn, peas, tomato, peppers, carrots, broccoli, green beans, spinach, greens, mixed vegetables, squash, zucchini, french fries, potatoes, sweet potatoes, coleslaw, okra, brussel, sprouts, lettuce, salad, and vegetable soup.**

**fruit=wic juice, oj, juice, orange, banana, apple, grapes, peaches, strawberr, melon, watermelon, pineapple, raisins,&apricots**

**vitc=oj, orange, strawberries, melon, and broccoli.**

**vita=melon, carrots, spinach, greens, squash, sweet potatoes, liver, and pumpkin pie.**

**sweet=hot choc, pudding, ice cream, fruit drinks, cookies, cake, pies, jello, chocolate, candy, sweet roll, pancake, donut, and soda.**

**fats=ice cream, cheese, mayo, chips, cookies, cake, pies, chocolate, coldcut, nuts, pb, bu, marg, fr chicken, fr fish, sausage, bacon ,donut, hotdogs and sweet roll.**

**Figure B. Food groups determined by the HSFFQ.**

Source: *The HSFFQ User's Manual* Page F-8: Colditz G. Dietary intake and health outcomes: final report. U.S. Department of Agriculture, Economic Research Service. Available at: <https://nalcd.nal.usda.gov/download/32818/PDF> (accessed on 11 December 2020).

| <b>TABLE 2</b>                                                         |       |                       |                       |
|------------------------------------------------------------------------|-------|-----------------------|-----------------------|
| <b>FOOD PORTION SIZE IN GRAM WEIGHT ASSIGNED TO FOODS ON THE HSFFQ</b> |       |                       |                       |
| Food Name                                                              | Women | Portion Size          |                       |
|                                                                        |       | Children<br>1-2 years | Children<br>3-5 years |
| Milk                                                                   | 270   | 183                   | 183                   |
| Hot Chocolate                                                          | 28    | 28                    | 28                    |
| Cheese, plain, in sandwiches                                           | 28    | 21                    | 21                    |
| Yogurt                                                                 | 198   | 117                   | 117                   |
| Ice Cream                                                              | 90    | 67                    | 67                    |
| Pudding                                                                | 119   | 80                    | 120                   |
| Orange                                                                 | 122   | 131                   | 131                   |
| Orange juice                                                           | 217   | 124                   | 155                   |
| Apple juice                                                            | 255   | 186                   | 186                   |
| Kool Aid, other fruit drinks                                           | 270   | 124                   | 155                   |
| Banana                                                                 | 102   | 91                    | 102                   |
| Apple or applesauce                                                    | 138   | 105                   | 124                   |
| Grapes                                                                 | 75    | 75                    | 75                    |
| Peaches                                                                | 166   | 123                   | 149                   |
| Strawberries                                                           | 47    | 47                    | 47                    |
| Cantaloupe                                                             | 127   | 68                    | 68                    |
| Watermelon                                                             | 440   | 120                   | 120                   |
| Pineapple                                                              | 80    | 47                    | 47                    |
| Raisins                                                                | 28    | 14                    | 28                    |
| Corn                                                                   | 83    | 42                    | 64                    |
| Peas                                                                   | 52    | 42                    | 42                    |
| Tomatoes                                                               | 62    | 31                    | 31                    |
| Peppers                                                                | 18    | 9                     | 9                     |
| Carrots                                                                | 70    | 29                    | 29                    |
| Broccoli                                                               | 70    | 46                    | 46                    |
| Green beans                                                            | 40    | 35                    | 35                    |
| Spinach                                                                | 70    | 27                    | 27                    |
| Greens                                                                 | 72    | 27                    | 27                    |
| Squash, orange or winter                                               | 156   | 49                    | 60                    |
| French fries, fried potatoes                                           | 115   | 42                    | 51                    |
| Potatoes                                                               | 99    | 72                    | 80                    |
| Sweet potatoes or yams                                                 | 70    | 49                    | 60                    |
| Cabbage or coleslaw                                                    | 67    | 33                    | 41                    |
| Lettuce salad                                                          | 55    | 37                    | 37                    |
| Salad dressing or mayonnaise                                           | 15    | 5                     | 12                    |
| Chips (potato, corn, others)                                           | 42    | 13                    | 20                    |
| Nuts                                                                   | 15    | 15                    | 15                    |
| Cookies or brownies                                                    | 25    | 22                    | 22                    |
| Cake or cupcake                                                        | 66    | 30                    | 30                    |
| Pie (pumpkin, etc.)                                                    | 140   | 37                    | 37                    |
| Other pie                                                              | 112   | 66                    | 66                    |
| Jello                                                                  | 90    | 90                    | 90                    |
| Chocolate candy                                                        | 32    | 18                    | 27                    |
| Other candy                                                            | 15    | 18                    | 18                    |
| Tea                                                                    | 180   | 120                   | 120                   |
| Soft drinks                                                            | 246   | 124                   | 186                   |
| Sugar-free soft drinks                                                 | 246   | 124                   | 186                   |
| Baked beans or chili beans                                             | 128   | 83                    | 128                   |
| Other dried beans, peas                                                | 85    | 58                    | 58                    |
| Rice                                                                   | 113   | 87                    | 87                    |
| Spaghetti or other pasta                                               | 310   | 192                   | 227                   |
| Pizza                                                                  | 140   | 72                    | 77                    |
| Macaroni and cheese                                                    | 168   | 121                   | 168                   |

Figure C. Portion size in gram weight assigned to each food item on the HSFFQ.

| <b>TABLE 2<br/>FOOD PORTION SIZE IN GRAM WEIGHT ASSIGNED TO FOODS ON THE HSFFQ</b> |                     |                               |                               |
|------------------------------------------------------------------------------------|---------------------|-------------------------------|-------------------------------|
| <b>Food Name</b>                                                                   | <b>Portion Size</b> |                               |                               |
|                                                                                    | <b>Women</b>        | <b>Children<br/>1-2 years</b> | <b>Children<br/>3-5 years</b> |
| Hot dogs                                                                           | 44                  | 44                            | 44                            |
| Hamburgers                                                                         | 121                 | 72                            | 105                           |
| Canned tuna                                                                        | 60                  | 49                            | 49                            |
| Cold cuts                                                                          | 28                  | 28                            | 28                            |
| Peanut butter                                                                      | 16                  | 16                            | 16                            |
| Bread, toast, or rolls                                                             | 25                  | 25                            | 25                            |
| Pork chops                                                                         | 84                  | 39                            | 56                            |
| Steak or roast beef                                                                | 108                 | 56                            | 56                            |
| Fish                                                                               | 85                  | 48                            | 56                            |
| Liver                                                                              | 84                  | 42                            | 42                            |
| Sausage                                                                            | 54                  | 28                            | 28                            |
| Bacon                                                                              | 16                  | 16                            | 16                            |
| Hot cereal or grits                                                                | 180                 | 154                           | 234                           |
| Cold breakfast cereal                                                              | 28                  | 21                            | 30                            |
| Doughnut                                                                           | 43                  | 38                            | 43                            |
| Sweet roll or muffin                                                               | 57                  | 44                            | 58                            |
| Pancake                                                                            | 33                  | 33                            | 33                            |
| English muffin or bagel                                                            | 50                  | 25                            | 25                            |
| Biscuit                                                                            | 28                  | 25                            | 32                            |
| Combread or tortillas                                                              | 56                  | 51                            | 56                            |
| Vegetable soup                                                                     | 270                 | 122                           | 244                           |
| Other soup                                                                         | 217                 | 122                           | 241                           |
| Crackers                                                                           | 15                  | 12                            | 12                            |
| Eggs                                                                               | 46                  | 59                            | 66                            |
| Mixed vegetables                                                                   | 116                 | 89                            | 69                            |

**Figure C continue.** Portion size in gram weight assigned to each food item on the HSFFQ.

Source: *The HSFFQ User's Manual* Page E-48: Colditz G. Dietary intake and health outcomes: final report. U.S. Department of Agriculture, Economic Research Service. Available at: <https://naldc.nal.usda.gov/download/32818/PDF> (accessed on 11 December 2020).

**Table D.** Portion size in gram weight assigned to each food item on the HSFFQ.

| Food item on the HSFFQ                               | Portion size in gram weight assigned to food item |       |
|------------------------------------------------------|---------------------------------------------------|-------|
|                                                      | Children 3-5 years                                | Adult |
| Milk                                                 | 183                                               | 270   |
| Hot Chocolate                                        | 28                                                | 28    |
| Cheese, plain or in sandwiches                       | 21                                                | 28    |
| Yogurt                                               | 117                                               | 198   |
| Ice cream (cones, sandwiches, sundaes)               | 67                                                | 90    |
| Pudding                                              | 120                                               | 119   |
| Orange juice or grapefruit juice                     | 155                                               | 217   |
| Other juice                                          | 186                                               | 255   |
| Fruit drinks (Hi-C, Kool-aid, lemonade, sportsdrink) | 155                                               | 270   |
| Banana                                               | 102                                               | 102   |
| Peaches                                              | 149                                               | 166   |
| *Fruit cocktail, mixed fruit                         | 117                                               | 149   |
| Orange or Grapefruit                                 | 131                                               | 122   |
| Apple or pear                                        | 124                                               | 138   |
| Applesauce                                           | 124                                               | 138   |
| Grapes                                               | 75                                                | 75    |
| Strawberries                                         | 47                                                | 47    |
| Melon (Cantaloupe)                                   | 68                                                | 127   |
| Pineapple                                            | 47                                                | 80    |
| Raisins or prunes                                    | 28                                                | 28    |
| Corn                                                 | 64                                                | 83    |
| Peas                                                 | 42                                                | 52    |
| Tomatoes, tomato sauce, salsa                        | 31                                                | 62    |
| Peppers (green, red, hot)                            | 9                                                 | 18    |
| Carrots                                              | 29                                                | 70    |
| Broccoli                                             | 46                                                | 70    |
| Green beans                                          | 35                                                | 40    |
| Spinach                                              | 27                                                | 70    |
| Greens(mustard,turnip,kale)                          | 27                                                | 72    |
| Mixed vegetables                                     | 69                                                | 116   |
| Squash, orange or winter                             | 60                                                | 156   |
| *Zucchini, yellow squash                             | 60                                                | 156   |
| French Fries, fried potatoes                         | 51                                                | 115   |
| Potato (baked, boiled, or mashed)                    | 80                                                | 99    |
| Sweet potatoes or yams                               | 60                                                | 70    |
| Cabbage, coleslaw or cauliflower                     | 41                                                | 67    |
| Lettuce salad                                        | 37                                                | 55    |
| Salad dressing                                       | 12                                                | 15    |
| Mayonnaise                                           | 12                                                | 15    |
| Chips (potato, corn, others)                         | 20                                                | 42    |
| *Popcorn or pretzels                                 | 20                                                | 42    |
| Crackers                                             | 12                                                | 15    |
| Nuts                                                 | 15                                                | 15    |
| Cookies or brownies                                  | 22                                                | 25    |
| Cake or cupcake                                      | 30                                                | 66    |
| Pie                                                  | 37                                                | 140   |
| Jello                                                | 90                                                | 90    |
| Chocolate or candy bar                               | 27                                                | 32    |
| Other candy (not chocolate)                          | 18                                                | 15    |
| Coffee or tea                                        | 120                                               | 180   |
| Soda, soft drink, pop (not sugar free)               | 186                                               | 246   |
| Soda, soft drink, pop (sugar free)                   | 186                                               | 246   |

| Food item on the HSFFQ                       | Portion size in gram weight assigned to food item |       |
|----------------------------------------------|---------------------------------------------------|-------|
|                                              | Children 3-5 years                                | Adult |
| Beer,wine,wine cooler, mixed drink or liquor | .                                                 | 116   |
| Beans(baked, chili, or other)                | 128                                               | 128   |
| Rice                                         | 87                                                | 113   |
| Spaghetti or other pasta                     | 227                                               | 310   |
| Pizza                                        | 77                                                | 140   |
| *Tacos, burritos                             | 77                                                | 140   |
| Macaroni and cheese                          | 168                                               | 168   |
| Hot dog                                      | 44                                                | 44    |
| Sausage                                      | 28                                                | 54    |
| Hamburger (prepared any way)                 | 105                                               | 121   |
| Canned Tuna                                  | 49                                                | 60    |
| Fried fish, fish sticks                      | 56                                                | 85    |
| Other fish                                   | 56                                                | 85    |
| Cold Cuts (baloney, ham, salami)             | 28                                                | 28    |
| *Fried Chicken, chicken nuggets              | 56                                                | 85    |
| *Other chicken or turkey                     | 56                                                | 108   |
| Pork or ham                                  | 56                                                | 84    |
| Roast beef or steak                          | 56                                                | 108   |
| Liver, organ meats                           | 42                                                | 84    |
| Peanut butter                                | 16                                                | 16    |
| Bread (slice) toast, roll, or pita           | 25                                                | 25    |
| *Butter (not margarine)                      | 7                                                 | 7     |
| *Margarine                                   | 7                                                 | 7     |
| Vegetable Soup                               | 244                                               | 270   |
| Other soup                                   | 241                                               | 217   |
| Cornbread or tortillas                       | 56                                                | 56    |
| Eggs                                         | 66                                                | 46    |
| Bacon                                        | 16                                                | 16    |
| Hot cereal or grits                          | 234                                               | 180   |
| Cold breakfast Cereal                        | 30                                                | 28    |
| Donut, fry bread                             | 43                                                | 43    |
| Sweet roll or muffin                         | 58                                                | 57    |
| Pancake, waffle, or French toast             | 33                                                | 33    |
| English muffin or bagel                      | 25                                                | 50    |
| Biscuit                                      | 32                                                | 28    |

Note: Food items with \* means whose the portion sizes were not given in the original *HSFFQ User's Manual*, then using "What's In the Foods You Eat" search tool to find measure weights for one serving size directly.

Table E. Nutrient data for food items on the HSFFQ used in this study.

| Food item                                            | Amount<br>(g) | Total<br>Calories<br>(kcal) | Protein<br>(gm) | Total<br>Fat<br>(gm) | Carbs<br>(gm) | Calcium<br>(mg) | Iron<br>(mg) | Zinc<br>(mg) | Vitamin C<br>(mg) | Vitamin<br>B6 (mg) | Vitamin<br>A (mcg) | Folate<br>(mcg) |
|------------------------------------------------------|---------------|-----------------------------|-----------------|----------------------|---------------|-----------------|--------------|--------------|-------------------|--------------------|--------------------|-----------------|
| Milk                                                 | 100           | 61                          | 3.2             | 3.2                  | 4.8           | 113             | 0.03         | 0.37         | 0                 | 0.04               | 46                 | 5               |
| Hot Chocolate                                        | 100           | 398                         | 6.7             | 9.7                  | 83.7          | 66.5            | 1.19         | 1.46         | 0.2               | 0.11               | 1                  | 6               |
| Cheese, plain or in sandwiches                       | 100           | 368.5                       | 18.1            | 31.2                 | 4.2           | 1045            | 0.63         | 2.49         | 0                 | 0.05               | 283.6              | 8               |
| Yogurt                                               | 100           | 102                         | 4.4             | 1.1                  | 19            | 210             | 0.07         | 0.74         | 0.7               | 0.04               | 61.8               | 9               |
| Ice cream (cones, sandwiches, sundaes)               | 100           | 207                         | 3.5             | 11                   | 23.6          | 128             | 0.09         | 0.69         | 0.6               | 0.05               | 117.6              | 5               |
| Pudding                                              | 100           | 122.4                       | 2               | 3.6                  | 21.4          | 102             | 0.37         | 0.31         | 0                 | 0.02               | 0                  | 3               |
| Orange juice or grapefruit juice                     | 100           | 45                          | 0.7             | 0.1                  | 10.8          | 9               | 0.1          | 0.05         | 38.9              | 0.04               | 5                  | 44              |
| Other juice                                          | 100           | 46                          | 0.1             | 0.1                  | 11.3          | 8               | 0.12         | 0.02         | 0.9               | 0.02               | 0                  | 0               |
| Fruit drinks (Hi-C, Kool-aid, lemonade, sportsdrink) | 100           | 35                          | 0               | 0                    | 9             | 16              | 0.05         | 0.02         | 11.2              | 0                  | 0                  | 0               |
| Banana                                               | 100           | 89                          | 1.1             | 0.3                  | 22.8          | 5               | 0.26         | 0.15         | 8.7               | 0.37               | 3                  | 20              |
| Peaches                                              | 100           | 74                          | 0.4             | 0.1                  | 19.9          | 3               | 0.27         | 0.09         | 2.8               | 0.02               | 17                 | 3               |
| Fruit cocktail, mixed fruit                          | 100           | 73                          | 0.4             | 0.1                  | 18.9          | 6               | 0.29         | 0.08         | 1.9               | 0.05               | 10                 | 3               |
| Orange or Grapefruit                                 | 100           | 47                          | 0.9             | 0.1                  | 11.8          | 40              | 0.1          | 0.07         | 53.2              | 0.06               | 11                 | 30              |
| Apple or pear                                        | 100           | 52                          | 0.3             | 0.2                  | 13.8          | 6               | 0.12         | 0.04         | 4.6               | 0.04               | 3                  | 3               |
| Applesauce                                           | 100           | 68                          | 0.2             | 0.2                  | 17.5          | 3               | 0.12         | 0.03         | 1.7               | 0.03               | 0.3                | 1               |
| Grapes                                               | 100           | 69                          | 0.7             | 0.2                  | 18.1          | 10              | 0.36         | 0.07         | 3.2               | 0.09               | 3                  | 2               |
| Strawberries                                         | 100           | 32                          | 0.7             | 0.3                  | 7.7           | 16              | 0.41         | 0.14         | 58.8              | 0.05               | 1                  | 24              |
| Melon (Cantaloupe)                                   | 100           | 34                          | 0.8             | 0.2                  | 8.2           | 9               | 0.21         | 0.18         | 36.7              | 0.07               | 169                | 21              |
| Pineapple                                            | 100           | 78                          | 0.3             | 0.1                  | 20.2          | 14              | 0.38         | 0.12         | 7.4               | 0.07               | 1                  | 5               |
| Raisins or prunes                                    | 100           | 299                         | 3.1             | 0.5                  | 79.2          | 50              | 1.88         | 0.22         | 2.3               | 0.17               | 0                  | 5               |
| Corn                                                 | 100           | 81                          | 2.5             | 0.7                  | 19.3          | 3               | 0.47         | 0.63         | 3.5               | 0.1                | 10                 | 35              |
| Peas                                                 | 100           | 78                          | 5.2             | 0.3                  | 14.3          | 24              | 1.52         | 0.67         | 9.9               | 0.11               | 105                | 59              |
| Tomatoes, tomato sauce, salsa                        | 100           | 18                          | 0.9             | 0.2                  | 3.9           | 10              | 0.27         | 0.17         | 13.7              | 0.08               | 42                 | 15              |
| Peppers (green, red, hot)                            | 100           | 20                          | 0.9             | 0.2                  | 4.6           | 10              | 0.34         | 0.13         | 80.4              | 0.22               | 18                 | 10              |
| Carrots                                              | 100           | 35                          | 0.8             | 0.2                  | 8.2           | 30              | 0.34         | 0.2          | 3.6               | 0.15               | 852                | 14              |
| Broccoli                                             | 100           | 35                          | 2.4             | 0.4                  | 7.2           | 40              | 0.67         | 0.45         | 64.9              | 0.2                | 77                 | 108             |
| Green beans                                          | 100           | 28                          | 1.5             | 0.2                  | 6.4           | 42              | 0.66         | 0.24         | 4.1               | 0.06               | 28                 | 23              |
| Spinach                                              | 100           | 23                          | 3               | 0.3                  | 3.8           | 136             | 3.57         | 0.76         | 9.8               | 0.24               | 524                | 146             |
| Greens (mustard,turnip,kale)                         | 100           | 28                          | 1.9             | 0.4                  | 5.6           | 72              | 0.9          | 0.24         | 41                | 0.14               | 681                | 13              |
| Mixed vegetables                                     | 100           | 65                          | 2.9             | 0.2                  | 13.1          | 25              | 0.82         | 0.49         | 3.2               | 0.07               | 214                | 19              |
| Squash, orange or winter                             | 100           | 37                          | 0.9             | 0.3                  | 8.9           | 22              | 0.44         | 0.22         | 9.6               | 0.16               | 349.4              | 20              |
| Zucchini, yellow squash                              | 100           | 15                          | 1.1             | 0.4                  | 2.7           | 18              | 0.37         | 0.33         | 12.9              | 0.08               | 56                 | 28              |
| French Fries, fried potatoes                         | 100           | 314.6                       | 3.9             | 15.1                 | 40.1          | 13              | 1.07         | 0.77         | 4                 | 0.35               | 0                  | 30              |
| Potato (baked, boiled, or mashed)                    | 100           | 100                         | 2.1             | 0.1                  | 23.3          | 5               | 0.41         | 0.33         | 15.1              | 0.32               | 0                  | 12              |
| Sweet potatoes or yams                               | 100           | 108                         | 1.3             | 0.3                  | 25.4          | 17              | 0.95         | 0.16         | 10.8              | 0.06               | 458                | 8               |
| Lettuce salad                                        | 100           | 14                          | 0.9             | 0.1                  | 3             | 18              | 0.41         | 0.15         | 2.8               | 0.04               | 25                 | 29              |
| Salad dressing                                       | 100           | 240                         | 0.4             | 21.1                 | 12.1          | 13              | 0.26         | 0.07         | 0.4               | 0.06               | 1.8                | 0               |
| Mayonnaise                                           | 100           | 680                         | 1               | 74.8                 | 0.6           | 8               | 0.21         | 0.15         | 0                 | 0.01               | 15.7               | 5               |



| Food item                              | Amount<br>(g) | Total<br>Calories<br>(kcal) | Protein<br>(gm) | Total<br>Fat<br>(gm) | Carbs<br>(gm) | Calcium<br>(mg) | Iron<br>(mg) | Zinc<br>(mg) | Vitamin C<br>(mg) | Vitamin<br>B6 (mg) | Vitamin<br>A (mcg) | Folate<br>(mcg) |
|----------------------------------------|---------------|-----------------------------|-----------------|----------------------|---------------|-----------------|--------------|--------------|-------------------|--------------------|--------------------|-----------------|
| Chips (potato, corn, others)           | 100           | 547.5                       | 7.2             | 36.4                 | 53.5          | 0               | 1.28         | 0.95         | 21.5              | 0.2                | 1.7                | 84              |
| Popcorn or pretzels                    | 100           | 550.8                       | 7.7             | 33                   | 55.7          | 20.8            | 1.91         | 2.2          | 0.1               | 0.29               | 18.3               | 15              |
| Crackers                               | 100           | 421                         | 9.5             | 8.9                  | 74.3          | 21              | 5.13         | 0.82         | 0                 | 0.06               | 0                  | 221.9           |
| Nuts                                   | 100           | 607                         | 20              | 54                   | 21            | 117             | 2.61         | 3.36         | 0.5               | 0.35               | 0.2                | 83              |
| Cookies or brownies                    | 100           | 474                         | 5.1             | 23.3                 | 63.9          | 26              | 3.2          | 0.65         | 0                 | 0.03               | 0                  | 69.3            |
| Cake or cupcake                        | 100           | 379                         | 3.2             | 17.8                 | 55.4          | 32              | 2.03         | 0.42         | 0                 | 0                  | 34.3               | 31.8            |
| Pie                                    | 100           | 258.1                       | 2.4             | 12.5                 | 34.5          | 32.9            | 0.98         | 0.24         | 1.8               | 0.04               | 1.4                | 65.7            |
| Jello                                  | 100           | 62                          | 1.2             | 0                    | 14.2          | 3               | 0.02         | 0.01         | 0                 | 0                  | 0                  | 1               |
| Chocolate or candy bar                 | 100           | 535                         | 7.7             | 29.7                 | 59.4          | 189             | 2.35         | 2.3          | 0                 | 0.04               | 59                 | 11              |
| Other candy (not chocolate)            | 100           | 394                         | 0               | 0.2                  | 62.9          | 3               | 0.3          | 0.01         | 0                 | 0                  | 0                  | 0               |
| Coffee or tea                          | 100           | 1                           | 0.1             | 0                    | 0             | 2               | 0.01         | 0.02         | 0                 | 0                  | 0                  | 2               |
| Soda, soft drink, pop (not sugar free) | 100           | 37                          | 0.1             | 0                    | 9.6           | 2               | 0.11         | 0.02         | 0                 | 0                  | 0                  | 0               |
| Soda, soft drink, pop (sugar free)     | 100           | 0.1                         | 0               | 0                    | 0             | 4               | 0.04         | 0            | 0                 | 0                  | 0                  | 0               |
| Beans(baked, chili, or other)          | 100           | 106                         | 5.2             | 1.5                  | 20            | 53              | 1.7          | 1.46         | 2                 | 0.06               | 0.1                | 36              |
| Rice                                   | 100           | 130                         | 2.7             | 0.3                  | 28.2          | 10              | 1.2          | 0.49         | 0                 | 0.09               | 0                  | 96.5            |
| Spaghetti or other pasta               | 100           | 158                         | 5.8             | 0.9                  | 30.9          | 7               | 1.28         | 0.51         | 0                 | 0.05               | 0                  | 119.2           |
| Pizza                                  | 100           | 266.6                       | 12.5            | 11.3                 | 29            | 262.5           | 1.65         | 1.35         | 2.4               | 0.12               | 65.5               | 96.9            |
| Tacos, burritos                        | 100           | 216                         | 9.1             | 11.2                 | 20            | 106             | 1.43         | 1.56         | 0.2               | 0.07               | 18.8               | 56.8            |
| Macaroni and cheese                    | 100           | 192.3                       | 5.8             | 9                    | 22.4          | 96.7            | 0.7          | 0.67         | 0                 | 0.05               | 69.5               | 81.8            |
| Hot dog                                | 100           | 313                         | 11.2            | 27.8                 | 3.7           | 13              | 1.25         | 2.06         | 0                 | 0.19               | 0                  | 10              |
| Sausage                                | 100           | 339                         | 19.4            | 28.4                 | 0             | 13              | 1.36         | 2.08         | 0.7               | 0.33               | 12                 | 3               |
| Hamburger (prepared any way)           | 100           | 271                         | 25.8            | 17.8                 | 0             | 24              | 2.48         | 6.25         | 0                 | 0.37               | 0                  | 10              |
| Canned Tuna                            | 100           | 187                         | 16              | 9.3                  | 9.4           | 17              | 1            | 0.56         | 2.2               | 0.08               | 24.4               | 8               |
| Fried fish, fish sticks                | 100           | 249                         | 11              | 13.2                 | 21.2          | 26              | 1.01         | 0.48         | 0                 | 0.05               | 25                 | 49.8            |
| Other fish                             | 100           | 105                         | 22.8            | 0.9                  | 0             | 14              | 0.49         | 0.58         | 1                 | 0.28               | 14                 | 8               |
| Cold Cuts (baloney, ham, salami)       | 100           | 308                         | 15.2            | 24.6                 | 5.5           | 85              | 1.21         | 2.3          | 0.8               | 0.3                | 25                 | 6               |
| Fried Chicken, chicken nuggets         | 100           | 269                         | 28.6            | 14.9                 | 3.2           | 17              | 1.38         | 2.04         | 0                 | 0.41               | 27                 | 11.1            |
| Other chicken or turkey                | 100           | 190                         | 28.9            | 7.4                  | 0             | 15              | 1.21         | 2.1          | 0                 | 0.47               | 16                 | 6               |
| Pork or ham                            | 100           | 222                         | 24.4            | 13                   | 0             | 28              | 0.68         | 2.15         | 0                 | 0.64               | 2                  | 0               |
| Roast beef or steak                    | 100           | 264                         | 26.4            | 16.8                 | 0             | 19              | 1.69         | 4.75         | 0                 | 0.55               | 0                  | 8               |
| Liver, organ meats                     | 100           | 175                         | 26.5            | 4.7                  | 5.2           | 6               | 6.17         | 5.23         | 0.7               | 1.03               | 7744               | 260             |
| Peanut butter                          | 100           | 588                         | 25.1            | 50.4                 | 19.6          | 43              | 1.87         | 2.91         | 0                 | 0.54               | 0                  | 74              |
| Bread (slice) toast, roll, or pita     | 100           | 265                         | 9.1             | 3.2                  | 49.1          | 260             | 3.59         | 0.84         | 0                 | 0.09               | 0                  | 171.2           |
| Butter (not margarine)                 | 100           | 717                         | 0.9             | 81.1                 | 0.1           | 24              | 0.02         | 0.09         | 0                 | 0                  | 684                | 3               |
| Margarine                              | 100           | 0                           | 0               | 0                    | 0             | 0               | 0            | 0            | 0                 | 0                  | 0                  | 0               |
| Vegetable Soup                         | 100           | 31                          | 2.2             | 0.8                  | 4.1           | 8               | 0.45         | 0.62         | 1                 | 0.03               | 38.8               | 4               |
| Other soup                             | 100           | 25                          | 1.3             | 0.9                  | 3             | 6               | 0.66         | 0.16         | 0                 | 0.02               | 15.2               | 12.2            |
| Cornbread or tortillas                 | 100           | 290.3                       | 6               | 10.2                 | 45.6          | 114.8           | 1.71         | 0.56         | 0.1               | 0.07               | 41.1               | 114.2           |
| Eggs                                   | 100           | 143                         | 12.6            | 9.5                  | 0.7           | 56              | 1.75         | 1.29         | 0                 | 0.17               | 160                | 47              |
| Hot cereal or grits                    | 100           | 71                          | 2.5             | 1.5                  | 12            | 9               | 0.9          | 1            | 0                 | 0                  | 0                  | 6               |
| Cold breakfast Cereal                  | 100           | 379                         | 13.1            | 6.5                  | 67.7          | 52              | 4.25         | 3.64         | 0                 | 0.1                | 0                  | 32              |
| Donut, fry bread                       | 100           | 441.5                       | 4.2             | 27                   | 48            | 78.4            | 1.55         | 0.35         | 0                 | 0.03               | 7.8                | 80.9            |

| Food item                        | Amount<br>(g) | Total<br>Calories<br>(kcal) | Protein<br>(gm) | Total<br>Fat<br>(gm) | Carbs<br>(gm) | Calcium<br>(mg) | Iron<br>(mg) | Zinc<br>(mg) | Vitamin C<br>(mg) | Vitamin<br>B6 (mg) | Vitamin<br>A (mcg) | Folate<br>(mcg) |
|----------------------------------|---------------|-----------------------------|-----------------|----------------------|---------------|-----------------|--------------|--------------|-------------------|--------------------|--------------------|-----------------|
| Sweet roll or muffin             | 100           | 371.1                       | 4.9             | 16                   | 52.8          | 46              | 1.36         | 0.52         | 0                 | 0.07               | 5.5                | 130.4           |
| Pancake, waffle, or French toast | 100           | 227                         | 6.4             | 9.7                  | 28.3          | 219             | 1.8          | 0.56         | 0.3               | 0.18               | 53.2               | 56.2            |
| English muffin or bagel          | 100           | 227                         | 8.9             | 1.7                  | 44.2          | 163             | 4            | 1.05         | 1.8               | 0.05               | 0                  | 133.5           |
| Biscuit                          | 100           | 316.2                       | 5.7             | 13.6                 | 43.3          | 25.4            | 2.36         | 0.4          | 0.1               | 0.03               | 0.8                | 142.5           |

Note: Vitamin B6 = Pyridoxine; Vitamin A = Retinol Activity Equivalents; Folate = Dietary Folate Equivalents.

Source: Harvard T.H. Chan School of Public Health Nutrition Department's file download site. Available at: <https://regepi.bwh.harvard.edu/health/nutrition.html> (accessed on 11 December 2020).
